# Supplementary material for: A Qualitative Study to Examine Feasibility and Design of an Online Social Networking Intervention to Increase Physical Activity in Teenage Girls
Source: PubMed Central journal article supplement (PMC4774869; doi:10.1371/journal.pone.0150817), 2016-03-02
Supplement: pone.0150817.s002.pdf [file pone.0150817.s002.pdf]

## Feasibility and design of an online social networking intervention to increase physical activity in teenage girls

### Teenage girls described physical activity as:

| Physical activity is                         | Focus group   | Physical activity is not | Focus group |
|----------------------------------------------|---------------|--------------------------|-------------|
| Team sports                                  | 1, 2, 3, 5, 6 | Not walking              | 1, 3, 4     |
| Running                                      | 2, 3, 4, 5    | Prefers solo sports      | 1, 2        |
| Dance                                        | 3, 4          | Not housework            | 3           |
| Training program                             | 1, 5          | Dislikes running         | 2           |
| Walking (to friends/transport to school/dog) | 2, 5          | Not dance                | 6           |
| Lot of fitness and sport                     | 1             |                          |             |
| Individual sport                             | 2             |                          |             |
| Gym                                          | 2             |                          |             |
| Routines                                     | 2             |                          |             |
| Playing with pets                            | 5             |                          |             |
| Swimming                                     | 5             |                          |             |
| Taekwondo                                    | 5             |                          |             |
| Playing running games such as "red rover"    | 6             |                          |             |

**Product Category defined as the package of benefits that arise from undertaking physical activity**

**Price Category defined as the cost (barriers) perceived in undertaking physical activity.**

| Benefits                   | Focus group | Costs                   | Focus group |
|----------------------------|-------------|-------------------------|-------------|
| <b>Physical/practical</b>  |             |                         |             |
| Fitness                    | 1, 3        | Time management         | 1, 2, 4     |
| Health                     | 2, 5        | Limited by injury       | 1           |
| Benefit afterwards         | 1           | School work             | 2, 4        |
| Motivated to be attractive | 2           | Paid work               | 2, 4        |
|                            |             | Lack of transport       | 2           |
|                            |             | Lack of money           | 2           |
|                            |             | Weather                 | 2           |
|                            |             | Safety (at night)       | 2           |
|                            |             | Other sport commitments | 4           |
|                            |             | No classes in holidays  | 4           |
| <b>Psychological</b>       |             |                         |             |

|                                                         |            |                                                                                                        |            |
|---------------------------------------------------------|------------|--------------------------------------------------------------------------------------------------------|------------|
| Enjoyment                                               | 1, 2, 3, 6 | Feel bad about self, due to comparison of performance, not keeping up, burden to team, not good enough | 1, 2, 4, 5 |
| Competition                                             | 1, 3, 6    | Failing to achieve goals on the amount of activity                                                     | 1          |
| Motivated by others/friends                             | 1, 2, 3, 4 | Perceived lack of control (due to training programme?)                                                 | 1          |
| Self-motivation to achieve personal best                | 1, 2, 3    | Negative messages about weight                                                                         | 2          |
| Do activity with friends                                | 1, 3, 4    | Rejection of invitations                                                                               | 5          |
| Social support/talking to a friend/parent while walking | 2, 3, 4    | Required to motivate friends to join                                                                   | 4          |
| Meet people                                             | 2, 4       | Responsible for other's motivation                                                                     | 4          |
| Improves mood / happiness                               | 3, 4       | Managing a group perceived to be a lot of work                                                         | 4          |
| Activity supported by parent                            | 1          |                                                                                                        |            |
| Self efficacy – sense of control                        | 1          |                                                                                                        |            |
| Makes you feel better about yourself                    | 5          |                                                                                                        |            |

**Social media as a promotion channel category defined as exploring the effectiveness of various social media formats may be effective for communicating a message about physical activity**

| <b>Facilitators</b>                             | <b>Focus group</b> | <b>Barriers</b>                                               | <b>Focus group</b> |
|-------------------------------------------------|--------------------|---------------------------------------------------------------|--------------------|
| <b>Parent perceptions</b>                       |                    |                                                               |                    |
| Parent supportive of app                        | 1, 2, 3, 4, 5, 6   | Parental concern re social pressure/over use/strangers online | 3, 5, 6            |
| Parent will like to be informed                 | 1, 3, 4            | Parents won't need to be informed                             | 2                  |
| Perceived neutral attitude of parents to online | 1, 4               | Protective parents                                            | 1                  |
| Parents will not perceived risk                 | 1                  | Social media addiction                                        | 1                  |
|                                                 |                    | Social media-rejection                                        | 1                  |
|                                                 |                    | Being forced to take up app                                   | 1                  |
| <b>Media platform</b>                           |                    |                                                               |                    |
| Facebook                                        | 1, 2, 3, 4, 5      | None or infrequent Facebook use                               | 6                  |
| Instagram                                       | 3, 6               |                                                               |                    |

|                  |      |  |  |
|------------------|------|--|--|
| Phone            | 4, 6 |  |  |
| Computer/ Laptop | 2, 4 |  |  |
| ipad             | 4, 5 |  |  |

### **Placement of product category defined as how PA messages are placed or distributed to create opportunities**

| <b>Facilitators</b>           | <b>Focus group</b> | <b>Barriers</b>                                | <b>Focus group</b> |
|-------------------------------|--------------------|------------------------------------------------|--------------------|
| Promotion through school      | 1, 4, 5, 6         | School not cool                                | 5                  |
| Credibility of the university | 1                  | School associated with being boring            | 4                  |
|                               |                    | School may be judged by non-friends            | 4                  |
|                               |                    | School opportunity for bullying if fall behind | 4                  |

### **Features of a social media based intervention category defined as factors that might facilitate an increase in physical activity**

| <b>Facilitators</b>                                       | <b>Focus group</b> | <b>Barriers</b>                                | <b>Focus group</b> |
|-----------------------------------------------------------|--------------------|------------------------------------------------|--------------------|
| <b>Competition</b>                                        |                    |                                                |                    |
| Competition element                                       | 1, 2, 4, 5, 6      | May be too competitive                         | 2                  |
|                                                           |                    | Pressure to perform                            | 2                  |
| <b>Group setting</b>                                      |                    |                                                |                    |
| Do with friends (provide support, ) encourage competition | 1, 2, 3, 5, 6      | Don't want to be a leader                      | 3, 4, 6            |
| Group consensus process                                   | 1, 2, 4, 5         | Needing to be friends with strangers           | 4, 5               |
| Family team                                               | 1                  | Difficulty motivating friends/Friends drop out | 4                  |
| Sharing roles                                             | 5                  | Falling behind                                 | 3                  |
| Encourage others to be more active                        | 6                  | Forgetful                                      | 3                  |
| Potential to make new friends                             | 6                  | Friends too kind to motivate effectively       | 1                  |
| Able to communicate with others about progress            | 2                  | Group size                                     | 2                  |
| Safe as only within group                                 | 2                  | Would need others to set up group              | 6                  |
| <b>Goal setting</b>                                       |                    |                                                |                    |
| Goals to get rewards building up points to earn prizes    | 1, 2, 3, 4         | Don't need reward                              | 1                  |
| Reward for joining, sustained effort, reaching levels     | 2                  | Unachievable goal                              | 5                  |
| Feedback                                                  |                    |                                                |                    |

|                                                                                                  |            |                                     |      |
|--------------------------------------------------------------------------------------------------|------------|-------------------------------------|------|
| feedback on progress, measurement of intensity, periods of activity, time, calorie use, distance | 1, 2, 5, 6 | Difficult to maintain interest      | 2    |
| Personalised data                                                                                | 1          | Entering information                | 1    |
| Notification on who is working out at the same time, goals, achievements                         | 2          | Errors in measurement device        | 1    |
| Online reviews from other users                                                                  | 2          |                                     |      |
| <b>Features of the programme</b>                                                                 |            |                                     |      |
| Variety                                                                                          | 2          | Technical problems/lack of internet | 2, 6 |
| Short duration of programme                                                                      | 2          | Daily                               | 3    |
| Timing to ensure relevant to other things that are happening                                     | 2          | Needing to log in                   | 2    |
| Ability to continue after 50 days                                                                | 2          | Novelty wears off                   | 2    |
| Able to do custom settings re number of notifications and timing of reminders                    | 2          | Over exposure                       | 3    |
| Control over choosing to exercise                                                                | 2          |                                     |      |
| Incorporates home based exercise                                                                 | 2          |                                     |      |
| Progression from walking to other exercises                                                      | 2          |                                     |      |
| Simple exercises                                                                                 | 2          |                                     |      |
| Weekly challenges                                                                                | 5          |                                     |      |
| Music                                                                                            | 5          |                                     |      |

### **Design category defined as features created by a graphic designer for an online social media program**

| <b>Facilitators</b>                | <b>Focus group</b> | <b>Barriers</b>                          | <b>Focus group</b> |
|------------------------------------|--------------------|------------------------------------------|--------------------|
| <b>Style</b>                       |                    |                                          |                    |
| Colour/bright/light                | 1, 2, 3, 4, 6      | Bland appearance                         | 4, 5, 6            |
| Photos                             | 2, 4, 6            | Cartoon                                  | 3, 4               |
| “Cool”                             | 1, 3, 5            | Too dark                                 | 3, 4               |
| Readability/clear font/easy to see | 1, 2, 4            | Boring design                            | 5, 6               |
| Simplicity                         | 1, 4               | Negative association (Ghetto appearance) | 1                  |
| Fit looking girls                  | 2                  | Unprofessional look                      | 2                  |
| Recognisable title                 | 2                  | Scrap book look                          | 2                  |
| Plain background                   | 3                  | Looking like a model                     | 2                  |
| Eye catching                       | 5                  | Bright colour                            | 3                  |
|                                    |                    | “in your face”                           | 3                  |
|                                    |                    | Dull appearance                          | 5                  |
|                                    |                    | Plain                                    | 5                  |

| <b>Images should</b>                           |               |                                         |            |
|------------------------------------------------|---------------|-----------------------------------------|------------|
| Portray a health body image                    | 1, 4, 6       | Not be childlike                        | 1, 3, 5    |
| Portray a realistic and appropriate body image | 1, 3, 4       | Not be too girly                        | 1, 6       |
| Portray a fit image                            | 1, 6          | Have no relevance of image to exercise  | 1, 6       |
| Be age appropriate                             | 1             |                                         |            |
| Be trustworthy                                 | 1             |                                         |            |
| <b>Text</b>                                    |               |                                         |            |
| Relevant tip                                   | 1, 2, 3, 4, 5 | Boring tip                              | 1, 2, 3, 4 |
| Facts                                          | 2, 3, 4, 5, 6 | Lame                                    | 1          |
| Simple                                         | 2, 5          | Not relevant to teenage girls           | 1, 2       |
| Shopping tips                                  | 3, 4, 5       | Humour                                  | 2, 6       |
| Achievable                                     | 1,2           | Feels forced                            | 1          |
| Motivating tip                                 | 1, 6          | Mixed messages                          | 1          |
| Useful/effective tip                           | 1             | No relevance to exercise                | 1          |
| Nutrition information                          | 1, 2          | Not coherent with other messages        | 1          |
| Advice on stress management                    | 2             | Contradiction between food and exercise | 2          |
| Inspirational people                           | 3             | Not logical                             | 2          |
| Message about fitness                          | 3             | Others story                            | 2          |
| Variety                                        | 1             | Sounds too old                          | 2          |
| Educational tip                                | 1             | Chores tips                             | 3          |
| Tips from role models                          | 1             | Inspirational tips that try too hard    | 3          |
| Inspirational text                             | 2             | Shopping tips                           | 6          |
| Short                                          | 2             |                                         |            |
| Addition of other exercise suggestions         | 2             |                                         |            |
| Advice on tiredness                            | 2             |                                         |            |
| Encouraging realistic progress                 | 4             |                                         |            |
| Motivational                                   | 4             |                                         |            |

Note: a feature may appear as both a facilitator and a barrier within one focus group reflecting opposing views of girls within the group.
